# Supplementary material
Source: PubMed Central journal article supplement (PMC6519087)
Supplement: NIHMS1520748-supplement-1.pdf [file NIHMS1520748-supplement-1.pdf]

**Online Supplement:**

**eTable 1: ADA Current Dental Terminology (CDT) Categories**

| <b>Code Description</b>        | <b>Code Range</b> |
|--------------------------------|-------------------|
| Diagnostic                     | D0100-D0999       |
| Preventive                     | D1000-D1999       |
| Restorative                    | D2000-D2999       |
| Endodontics                    | D3000-D3999       |
| Periodontics                   | D4000-D4999       |
| Prosthodontics (removable)     | D5000-D5899       |
| Maxillofacial prosthetics      | D5900-D5999       |
| Implant services               | D6000-D6199       |
| Prosthodontics (fixed)         | D6200-D6999       |
| Oral and maxillofacial surgery | D7000-D7999       |
| Orthodontics                   | D8000-D8999       |
| Adjunctive general services    | D9000-D9999       |

**eTable 2: Relationship between Visits for Beneficiaries with a History of Prior High Risk Prescription Use and Visit Type**

| <b>High Risk Status</b>     | <b>Probability of any opioid prescription, % (95% CI)</b> |                           |
|-----------------------------|-----------------------------------------------------------|---------------------------|
|                             | <b>Invasive Visit</b>                                     | <b>Non Invasive Visit</b> |
| Yes                         | 60.2 (59.6; 60.8)                                         | 12.0 (11.7; 12.2)         |
| No                          | 36.7 (36.4; 36.9)                                         | 2.75 (2.7; 2.8)           |
| Percentage Point Difference | 23.5 (22.8; 24.2)                                         | 9.2 (8.9; 9.5)            |
| Difference in differences   | 14.3 (13.6; 14.9)                                         |                           |
